# Supplementary material for: Phytochemical and Biological Activity Studies on Nasturtium officinale (Watercress) Microshoot Cultures Grown in RITA® Temporary Immersion Systems
Source: PubMed Central journal article supplement (PMC7696031; doi:10.3390/molecules25225257), 2020-11-11
Supplement: molecules-25-05257-s001.pdf [file molecules-25-05257-s001.pdf]

# Phytochemical and Biological Activity Studies on *Nasturtium officinale* (Watercress) Microshoot Cultures Grown in RITA<sup>®</sup> Temporary Immersion Systems

Marta Klimek-Szczykutowicz<sup>1</sup>, Michał Dziurka<sup>2</sup>, Ivica Blažević<sup>3</sup>, Azra Đulović<sup>3</sup>, Sebastian Granica<sup>4</sup>,  
Izabela Korona-Głowniak<sup>5</sup>, Halina Ekiert<sup>1</sup>, Agnieszka Szopa<sup>1\*</sup>

<sup>1</sup> Chair and Department of Pharmaceutical Botany, Faculty of Pharmacy, Jagiellonian University, Medical College, Medyczna 9, 30-688 Kraków, Poland, marta.klimek-szczykutowicz@doctoral.uj.edu.pl (M.K.-S.), a.szopa@uj.edu.pl (A.S.), mfekiert@cyf-kr.edu.pl (H.E.)

<sup>2</sup> Polish Academy of Sciences, The Franciszek Górski Institute of Plant Physiology, Niezapominajek 21, 30-239 Kraków, Poland, email: m.dziurka@ifr-pan.edu.pl (M.D.)

<sup>3</sup> Department of Organic Chemistry, Faculty of Chemistry and Technology, University of Split, Ruđera Boškovića 35, 21000 Split, Croatia, e-mail: blazevic@ktf-split.hr (I.B.); azra@ktf-split.hr (A.Đ.)

<sup>4</sup> Department of Pharmacognosy and Molecular Basis and Phytotherapy, Medical University of Warsaw, Banacha 1, 02-097 Warszawa, Poland, e-mail: sgranica@wum.edu.pl (S.G.)

<sup>5</sup> Department of Pharmaceutical Microbiology, Faculty of Pharmacy with Division of Medical Analytics, Medical University of Lublin, Chodźki 1, 20-093 Lublin, Poland, e-mail: iza.glowniak@umlub.pl (I.K.-G.)

\*Correspondence: a.szopa@uj.edu.pl; Tel.: +48-12-620-5436 (A.S.)

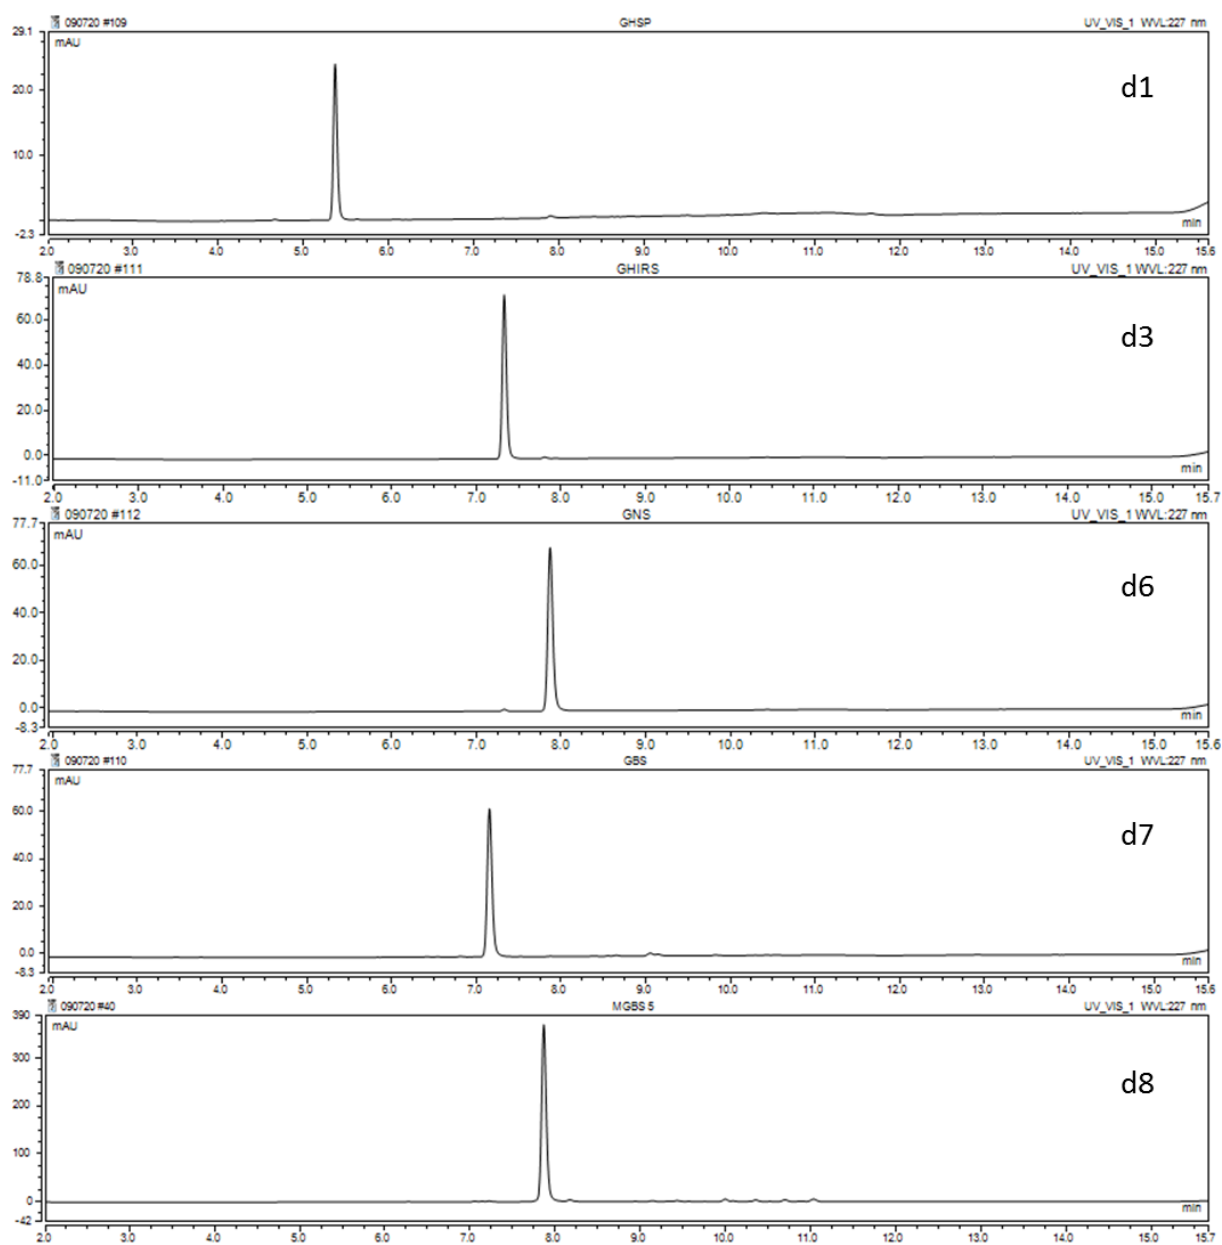

Figure S1. The chromatograms of the desulfoglucosinolates standards used.

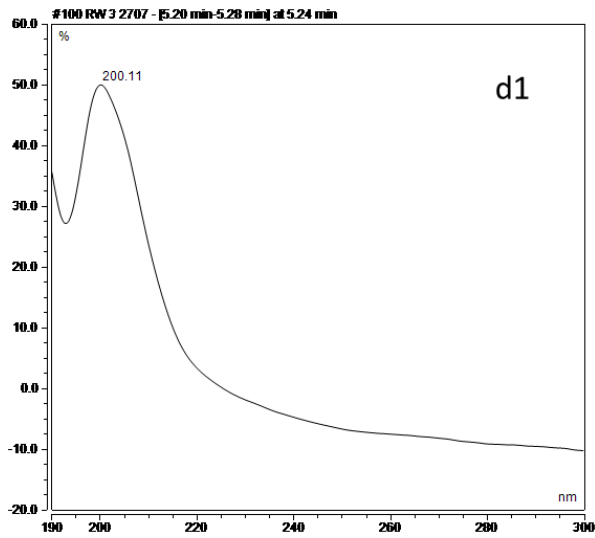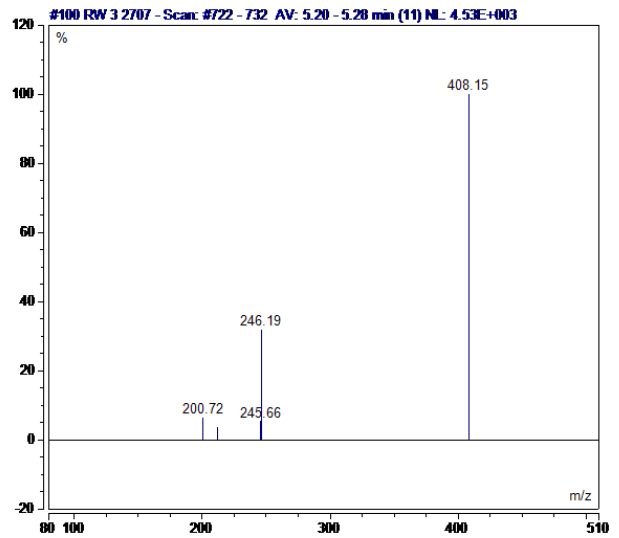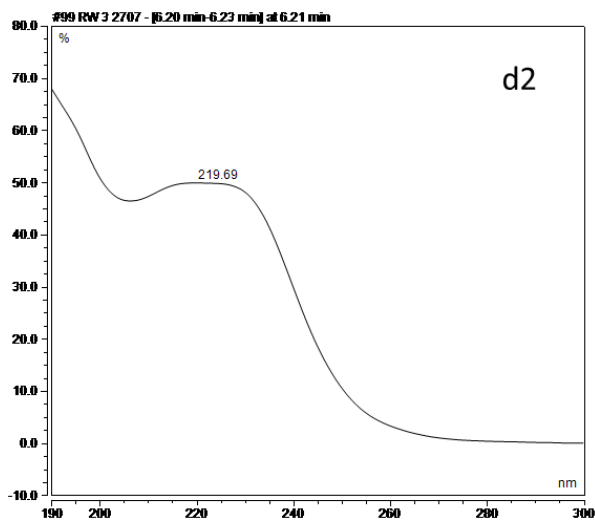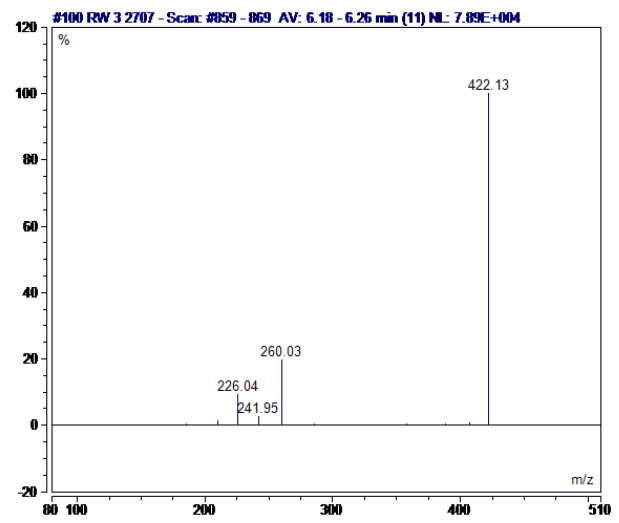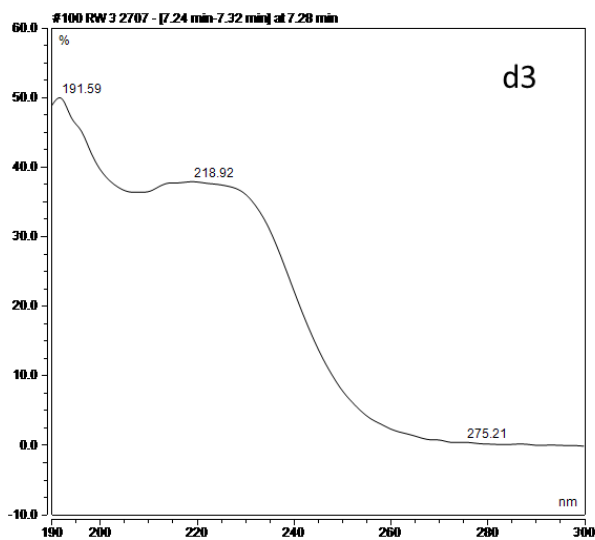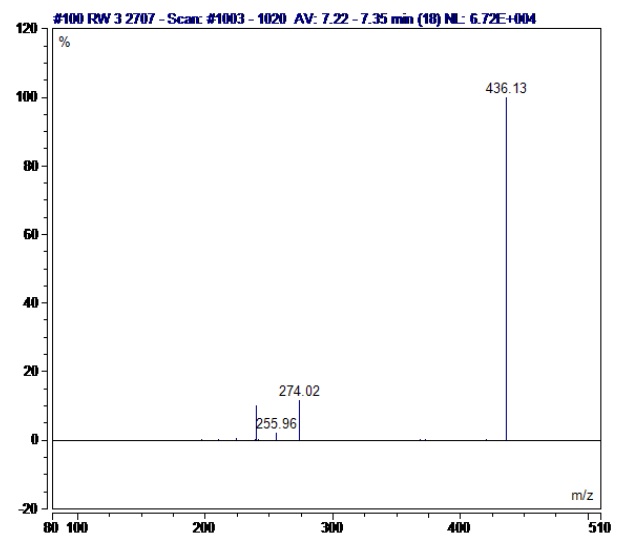

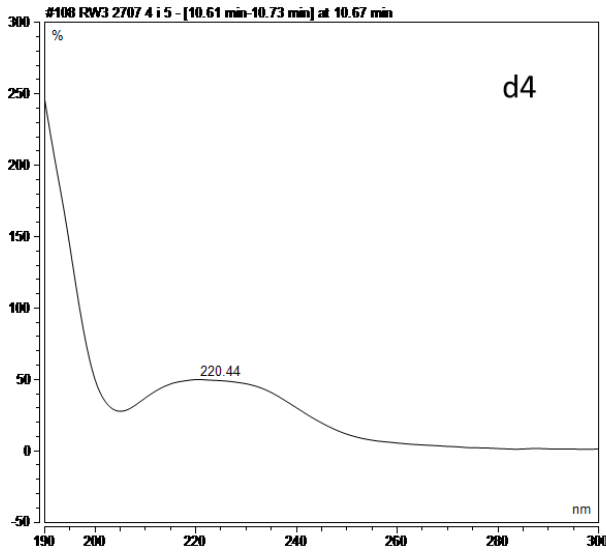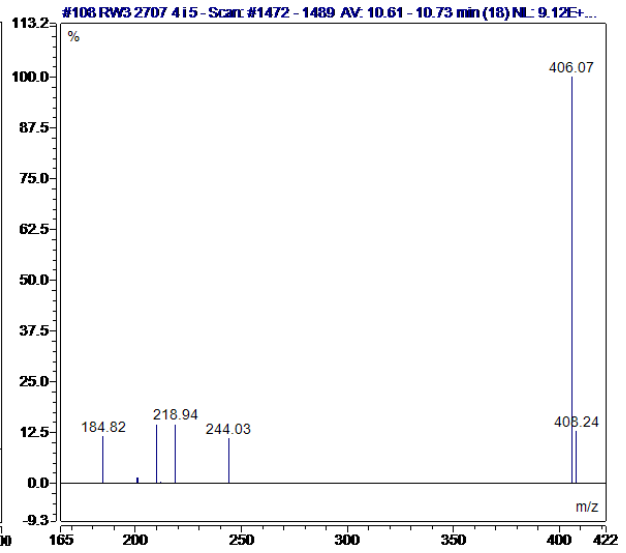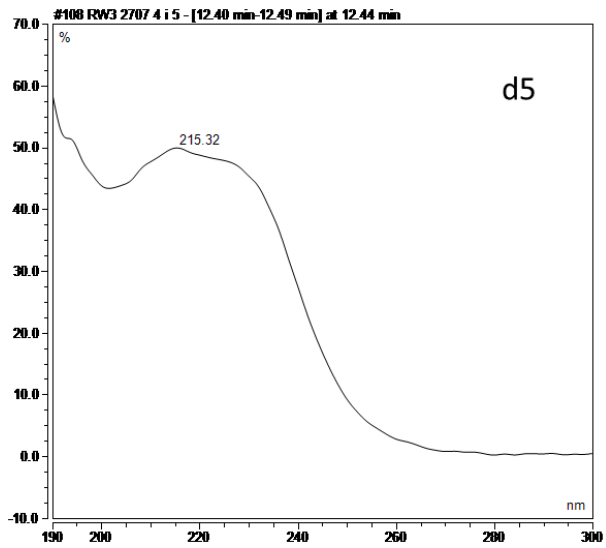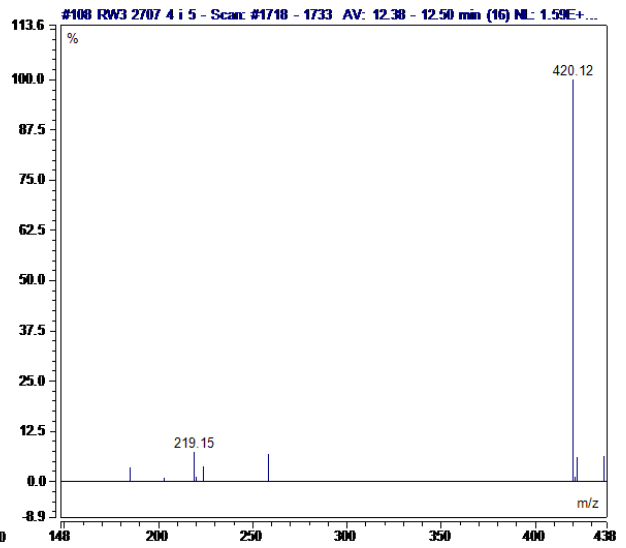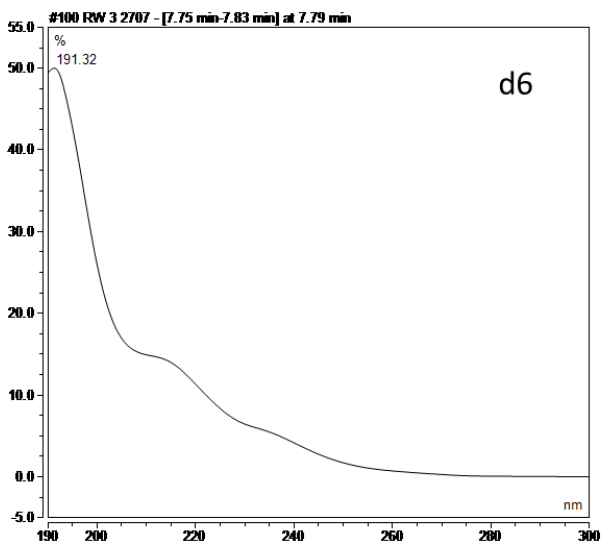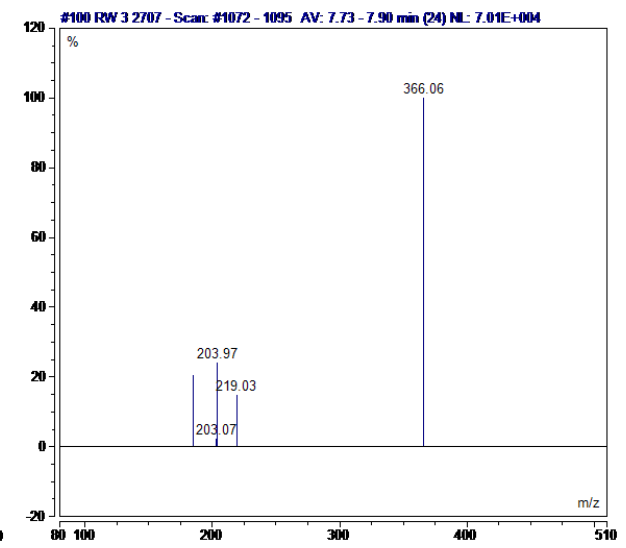

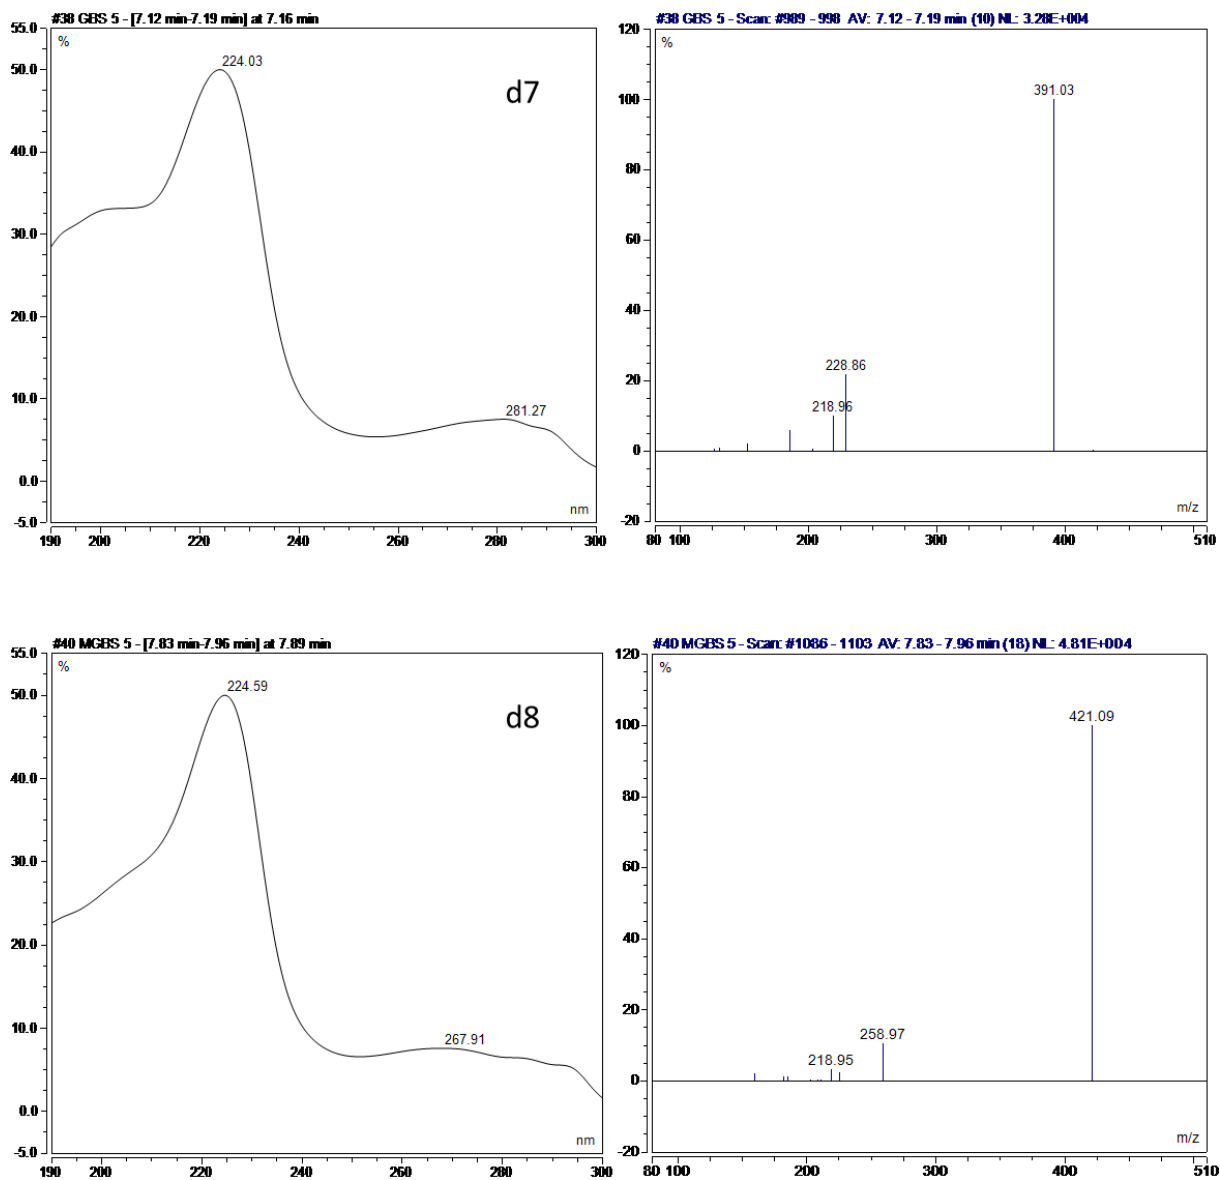

**Figure S2.** UV-Vis and MS<sup>2</sup> spectra at 15V ionization of all desulfoglucosinolates detected. Numbers correspond to the Table 2.
